# Supplementary material for: Recurrence-associated pathways in hepatitis B virus-positive hepatocellular carcinoma
Source: PubMed Central journal article supplement (PMC4448317; doi:10.1186/s12864-015-1472-x), 2015-04-10
Supplement: 12864_2015_1472_MOESM1_ESM.pdf [file 12864_2015_1472_MOESM1_ESM.pdf]

**Table S1. Top 20 recurrence-associated genes in our HBV-HCC dataset**

| <b>Symbol</b> | <b>Log-rank<br/><i>p</i>-value</b> | <b>FDR<sup>1</sup></b> | <b>Permutation<br/><i>p</i>-value<sup>2</sup></b> | <b>Hazard ratio<br/>(95% CI)</b> | <b>Function</b>      | <b>References<sup>3</sup></b> |
|---------------|------------------------------------|------------------------|---------------------------------------------------|----------------------------------|----------------------|-------------------------------|
| KNG1          | 5.30E-05                           | 0.194                  | < 1E-07                                           | 0.579 (0.444 0.754)              | Blood coagulation    | 1                             |
| TM4SF1        | 6.69E-05                           | 0.194                  | 2.00E-04                                          | 3.100 (1.777 5.405)              | Angiogenesis         | 2,3                           |
| LRRC31        | 8.25E-05                           | 0.194                  | 5.00E-04                                          | 0.389 (0.243 0.622)              |                      |                               |
| POLR3GL       | 9.89E-05                           | 0.194                  | 1.00E-04                                          | 0.333 (0.191 0.579)              | Polymerase           | 4                             |
| ZNF10         | 0.000131                           | 0.194                  | 0.0013                                            | 0.501 (0.351 0.713)              | Transcription        | 5                             |
| DARS          | 0.000135                           | 0.194                  | < 1E-07                                           | 4.563 (2.093 9.950)              | Translation          | 6                             |
| NUAK1         | 0.000169                           | 0.194                  | 2.00E-04                                          | 3.189 (1.743 5.835)              | Signaling            | 7,8,9                         |
| CFL1          | 0.000188                           | 0.194                  | 3.00E-04                                          | 6.145 (2.370 15.940)             | Invasion             | 10,11                         |
| EEPDI         | 0.000211                           | 0.194                  | 4.00E-04                                          | 2.768 (1.615 4.742)              | DNA repair           | 12                            |
| CCDC112       | 0.000220                           | 0.194                  | 1.00E-04                                          | 7.042 (2.500 19.830)             |                      |                               |
| TRAFD1        | 0.000228                           | 0.194                  | 0.0033                                            | 1.837 (1.330 2.539)              | Signaling            | 13                            |
| FCGR3B        | 0.000267                           | 0.208                  | 3.00E-04                                          | 2.117 (1.414 3.169)              | Immune               | 14,15                         |
| SCN9A         | 0.000330                           | 0.236                  | 1.00E-04                                          | 4.166 (1.912 9.080)              | Neuronal disease     | 16                            |
| C10orf10      | 0.000352                           | 0.236                  | 4.00E-04                                          | 1.877 (1.329 2.652)              | Signaling            | 17,18                         |
| S100A9        | 0.000409                           | 0.249                  | 5.00E-04                                          | 1.452 (1.181 1.786)              | Cancer               | 19,20                         |
| TMEM141       | 0.000425                           | 0.249                  | 5.00E-04                                          | 3.677 (1.782 7.587)              |                      |                               |
| LRRC20        | 0.000462                           | 0.254                  | 3.00E-04                                          | 0.294 (0.148 0.583)              | Immune               | 21                            |
| B3GNT2        | 0.000510                           | 0.257                  | 3.00E-04                                          | 0.411 (0.249 0.678)              | Metabolism<br>Immune | 22                            |
| C1D           | 0.000521                           | 0.257                  | 7.00E-04                                          | 4.022 (1.832 8.829)              | Apoptosis            | 23                            |
| YTHDF2        | 0.000569                           | 0.265                  | 5.00E-04                                          | 5.174 (2.032 13.180)             | Cancer               | 24,25                         |
| SAPS3         | 0.000595                           | 0.265                  | 0.0012                                            | 0.239                            |                      |                               |
| PSMA5         | 0.000699                           | 0.281                  | 6 E-04                                            | 2.302                            |                      |                               |
| MAP7D3        | 0.000704                           | 0.281                  | 0.0012                                            | 6.264                            |                      |                               |
| ARFGAP3       | 0.000746                           | 0.281                  | 8 E-04                                            | 5.203                            |                      |                               |
| LRRFIP1       | 0.000750                           | 0.281                  | 0.0011                                            | 7.959                            |                      |                               |
| CPNE3         | 0.000809                           | 0.283                  | 7 E-04                                            | 4.229                            |                      |                               |
| EXTL3         | 0.000836                           | 0.283                  | 0.0012                                            | 0.265                            |                      |                               |
| ST8SIA4       | 0.000848                           | 0.283                  | 8 E-04                                            | 0.401                            |                      |                               |
| SERPINB1      | 0.000876                           | 0.283                  | 0.0013                                            | 3.934                            |                      |                               |
| ARPC1B        | 0.000960                           | 0.3                    | 5 E-04                                            | 2.266                            |                      |                               |
| CEP350        | 0.00114                            | 0.346                  | 0.0012                                            | 0.181                            |                      |                               |
| EIF3M         | 0.00118                            | 0.346                  | 0.0013                                            | 4.562                            |                      |                               |
| CALU          | 0.00124                            | 0.346                  | 0.0014                                            | 4.674                            |                      |                               |
| CYP11A1       | 0.00125                            | 0.346                  | 0.0014                                            | 0.241                            |                      |                               |
| TMPO          | 0.00133                            | 0.349                  | 0.0016                                            | 0.359                            |                      |                               |

---

|           |         |       |        |       |
|-----------|---------|-------|--------|-------|
| GPR126    | 0.00134 | 0.349 | 0.0014 | 4.343 |
| ZC3H15    | 0.00156 | 0.357 | 0.0021 | 3.825 |
| CREM      | 0.00159 | 0.357 | 0.0012 | 2.442 |
| WDR90     | 0.00165 | 0.357 | 0.0019 | 2.432 |
| LOC643684 | 0.00170 | 0.357 | 0.0016 | 0.357 |
| HIAT1     | 0.00180 | 0.357 | 0.0018 | 5.953 |
| GPR135    | 0.00202 | 0.357 | 0.0062 | 0.257 |
| EML3      | 0.00208 | 0.357 | 0.0022 | 0.354 |
| ALS2CL    | 0.00210 | 0.357 | 0.0022 | 0.405 |
| NOC2L     | 0.00217 | 0.357 | 0.0021 | 5.558 |
| WHSC1L1   | 0.00218 | 0.357 | 0.0025 | 2.329 |
| MAN2B1    | 0.00218 | 0.357 | 0.0034 | 2.615 |
| ZNF609    | 0.00225 | 0.357 | 0.0025 | 0.285 |
| SLC16A1   | 0.00228 | 0.357 | 0.0032 | 2.074 |
| FHOD3     | 0.00229 | 0.357 | 0.0018 | 3.764 |
| FN1       | 0.00231 | 0.357 | 0.0018 | 2.224 |
| INTS5     | 0.00238 | 0.357 | 0.0026 | 0.31  |
| SDAD1     | 0.00245 | 0.357 | 0.0019 | 3.704 |
| KIAA0430  | 0.00247 | 0.357 | 0.0041 | 1.921 |
| XPA       | 0.00255 | 0.357 | 0.0025 | 5.208 |
| APOA1     | 0.00257 | 0.357 | 0.0019 | 0.755 |
| FUT1      | 0.00264 | 0.357 | 0.003  | 0.378 |
| CDC27     | 0.00274 | 0.357 | 0.0026 | 0.141 |
| FAM125B   | 0.00275 | 0.357 | 0.0026 | 4.562 |
| MST1R     | 0.00276 | 0.357 | 0.0033 | 0.155 |
| SAMHD1    | 0.00278 | 0.357 | 0.0036 | 2.432 |
| DDX26B    | 0.00279 | 0.357 | 0.0031 | 2.876 |
| APOA2     | 0.00280 | 0.357 | 0.0033 | 0.755 |
| EP400NL   | 0.00284 | 0.357 | 0.0025 | 0.24  |
| CORO1C    | 0.00284 | 0.357 | 0.0022 | 3.068 |
| CLDN15    | 0.00287 | 0.357 | 0.0026 | 0.319 |
| KRT19     | 0.00287 | 0.357 | 0.003  | 2.612 |
| JAGN1     | 0.00293 | 0.357 | 0.0033 | 2.738 |
| EVC       | 0.00293 | 0.357 | 0.003  | 2.616 |
| ATP6V0C   | 0.00303 | 0.357 | 0.0029 | 4.572 |
| PDGFC     | 0.00304 | 0.357 | 0.0038 | 1.949 |
| TMEM166   | 0.00307 | 0.357 | 0.0042 | 2.38  |
| C11orf41  | 0.00309 | 0.357 | 0.0034 | 1.673 |
| SRGAP3    | 0.00311 | 0.357 | 0.0033 | 3.204 |
| CSNK1A1   | 0.00313 | 0.357 | 0.0031 | 0.296 |
| TLK2      | 0.00315 | 0.357 | 0.0047 | 2.053 |
| HOXA13    | 0.00315 | 0.357 | 0.0032 | 2.701 |
| LY6E      | 0.00317 | 0.357 | 0.0038 | 1.912 |
| ZNF205    | 0.00317 | 0.357 | 0.0028 | 0.314 |
| GMFB      | 0.00318 | 0.357 | 0.0047 | 0.358 |
| JDP2      | 0.00318 | 0.357 | 0.0031 | 0.315 |
| SLC6A1    | 0.00318 | 0.357 | 0.0028 | 0.521 |
| GABRA1    | 0.00322 | 0.357 | 0.0048 | 0.568 |

---

---

|          |         |       |        |       |
|----------|---------|-------|--------|-------|
| FXN      | 0.00323 | 0.357 | 0.0028 | 3.536 |
| USF1     | 0.00327 | 0.357 | 0.0022 | 0.352 |
| MAP2K3   | 0.00328 | 0.357 | 0.0027 | 3.575 |
| ZNF180   | 0.00341 | 0.357 | 0.004  | 0.225 |
| LRPPRC   | 0.00343 | 0.357 | 0.003  | 2.569 |
| ANXA5    | 0.00345 | 0.357 | 0.0034 | 2.3   |
| C11orf31 | 0.00354 | 0.357 | 0.0029 | 3.398 |
| AACS     | 0.00358 | 0.357 | 0.0044 | 5.457 |
| RAB43    | 0.00359 | 0.357 | 0.0039 | 0.448 |
| MAST3    | 0.00362 | 0.357 | 0.0028 | 0.179 |
| GPR175   | 0.00367 | 0.357 | 0.0041 | 0.278 |
| ZNF433   | 0.00377 | 0.357 | 0.0043 | 0.467 |
| IL12A    | 0.00383 | 0.357 | 0.0036 | 0.446 |
| CHD1     | 0.00383 | 0.357 | 0.004  | 0.242 |
| CNOT6    | 0.00385 | 0.357 | 0.0048 | 0.144 |
| TCEAL8   | 0.00387 | 0.357 | 0.0034 | 0.373 |
| PTP4A2   | 0.00387 | 0.357 | 0.0042 | 4.359 |
| EPDR1    | 0.00396 | 0.357 | 0.0032 | 2.08  |
| COL17A1  | 0.00396 | 0.357 | 0.0042 | 0.373 |
| PCBP2    | 0.00397 | 0.357 | 0.005  | 2.564 |
| PDE1A    | 0.00397 | 0.357 | 0.0048 | 2.013 |
| GRPEL2   | 0.00400 | 0.357 | 0.0042 | 2.64  |
| UTP3     | 0.00408 | 0.361 | 0.0077 | 3.815 |
| MRPS2    | 0.00415 | 0.361 | 0.0032 | 4.386 |
| CRKL     | 0.00418 | 0.361 | 0.005  | 0.219 |
| FAM84A   | 0.00420 | 0.361 | 0.0048 | 5.384 |
| EIF1     | 0.00433 | 0.369 | 0.0029 | 2.702 |
| FAM118B  | 0.00440 | 0.371 | 0.0072 | 0.582 |
| KLF16    | 0.00456 | 0.374 | 0.0051 | 2     |
| VASP     | 0.00458 | 0.374 | 0.0066 | 5.847 |
| ALS2     | 0.00460 | 0.374 | 0.0044 | 0.265 |
| RGS10    | 0.00469 | 0.374 | 0.0047 | 0.356 |
| RHOBTB1  | 0.00470 | 0.374 | 0.005  | 2.365 |
| SILV     | 0.00471 | 0.374 | 0.0041 | 0.264 |
| ACOX1    | 0.00471 | 0.374 | 0.0053 | 4.503 |
| C20orf59 | 0.00478 | 0.374 | 0.0045 | 0.203 |
| CCL24    | 0.00480 | 0.374 | 0.0053 | 0.481 |
| VSIG4    | 0.00484 | 0.374 | 0.0064 | 1.799 |
| PER1     | 0.00490 | 0.374 | 0.0062 | 3.796 |
| SHPRH    | 0.00492 | 0.374 | 0.0059 | 0.304 |
| SLC35F2  | 0.00496 | 0.375 | 0.005  | 0.216 |
| KIAA1949 | 0.00501 | 0.375 | 0.0052 | 2.474 |
| ESRRA    | 0.00507 | 0.377 | 0.0059 | 0.116 |
| SOD2     | 0.00525 | 0.387 | 0.006  | 1.774 |
| FAM122B  | 0.00531 | 0.389 | 0.0063 | 0.232 |
| SLC41A1  | 0.00543 | 0.389 | 0.0054 | 1.616 |
| C18orf55 | 0.00549 | 0.389 | 0.0063 | 0.316 |
| CTSL1    | 0.00552 | 0.389 | 0.0066 | 1.809 |

---

---

|              |         |       |        |       |
|--------------|---------|-------|--------|-------|
| RACGAP1      | 0.00553 | 0.389 | 0.0061 | 3.085 |
| C11orf77     | 0.00554 | 0.389 | 0.0075 | 0.349 |
| LOC388210    | 0.00556 | 0.389 | 0.0051 | 0.253 |
| PSMG3        | 0.00573 | 0.39  | 0.006  | 1.734 |
| FMNL1        | 0.00573 | 0.39  | 0.0062 | 0.344 |
| SYNPO        | 0.00580 | 0.39  | 0.0054 | 0.382 |
| PNPLA6       | 0.00584 | 0.39  | 0.006  | 0.171 |
| ASPH         | 0.00586 | 0.39  | 0.0068 | 3.598 |
| C11orf82     | 0.00593 | 0.39  | 0.0059 | 0.52  |
| NFKBIB       | 0.00599 | 0.39  | 0.006  | 0.463 |
| GTF3A        | 0.00600 | 0.39  | 0.0049 | 2.987 |
| LOC100131861 | 0.00604 | 0.39  | 0.0069 | 0.337 |
| UBTD2        | 0.00605 | 0.39  | 0.006  | 0.252 |
| FCF1         | 0.00612 | 0.39  | 0.008  | 0.322 |
| CLSPN        | 0.00615 | 0.39  | 0.0052 | 0.265 |
| JUN          | 0.00616 | 0.39  | 0.0075 | 2.766 |
| CCDC14       | 0.00616 | 0.39  | 0.0054 | 0.327 |
| TBC1D13      | 0.00626 | 0.392 | 0.007  | 0.308 |
| PFDN5        | 0.00630 | 0.392 | 0.0064 | 2.762 |
| PCSK5        | 0.00634 | 0.392 | 0.007  | 0.369 |
| PPBP         | 0.00641 | 0.392 | 0.0066 | 3.346 |
| CCT2         | 0.00644 | 0.392 | 0.0088 | 2.13  |
| KIAA0196     | 0.00644 | 0.392 | 0.007  | 2.474 |
| SPI1         | 0.00653 | 0.392 | 0.0062 | 0.452 |
| ZSCAN16      | 0.00660 | 0.392 | 0.0082 | 0.468 |
| HOMER1       | 0.00668 | 0.392 | 0.0069 | 2.31  |
| GSTA1        | 0.00670 | 0.392 | 0.0065 | 0.732 |
| CEBPG        | 0.00670 | 0.392 | 0.0066 | 0.169 |
| CASC3        | 0.00671 | 0.392 | 0.0072 | 0.317 |
| ANP32A       | 0.00677 | 0.392 | 0.0072 | 0.466 |
| PAQR8        | 0.00683 | 0.392 | 0.0069 | 0.247 |
| CISD3        | 0.00684 | 0.392 | 0.006  | 3.885 |
| BOP1         | 0.00692 | 0.392 | 0.0072 | 2.004 |
| ZNF638       | 0.00698 | 0.392 | 0.0074 | 0.194 |
| TRIT1        | 0.00705 | 0.392 | 0.008  | 3.344 |
| TNFAIP3      | 0.00708 | 0.392 | 0.0065 | 1.636 |
| HMGB1        | 0.00708 | 0.392 | 0.0084 | 0.117 |
| TUFM         | 0.00708 | 0.392 | 0.007  | 2.226 |
| SULT1A1      | 0.00717 | 0.393 | 0.0079 | 1.75  |
| PTPRG        | 0.00718 | 0.393 | 0.0078 | 2.906 |
| DDX21        | 0.00732 | 0.397 | 0.0065 | 2.77  |
| SYT7         | 0.00733 | 0.397 | 0.0075 | 0.367 |
| LITAF        | 0.00752 | 0.405 | 0.0064 | 3.716 |
| LBP          | 0.00757 | 0.405 | 0.0064 | 1.633 |
| C14orf131    | 0.00774 | 0.411 | 0.0093 | 0.309 |
| HIF1A        | 0.00784 | 0.411 | 0.009  | 1.721 |
| NEIL3        | 0.00796 | 0.411 | 0.0096 | 2.926 |
| MCCC1        | 0.00799 | 0.411 | 0.008  | 0.191 |

---

|           |         |       |        |       |
|-----------|---------|-------|--------|-------|
| ASB3      | 0.00801 | 0.411 | 0.0105 | 0.569 |
| FLJ11151  | 0.00803 | 0.411 | 0.0083 | 2.295 |
| IFIT2     | 0.00805 | 0.411 | 0.0086 | 0.374 |
| ABCD3     | 0.00807 | 0.411 | 0.009  | 3.193 |
| APLP2     | 0.00808 | 0.411 | 0.0077 | 2.617 |
| NPAL2     | 0.00819 | 0.414 | 0.0088 | 0.236 |
| POLR3G    | 0.00827 | 0.416 | 0.0111 | 0.54  |
| CAP1      | 0.00841 | 0.421 | 0.0082 | 0.407 |
| CXCL5     | 0.00846 | 0.421 | 0.0102 | 3.774 |
| RNF141    | 0.00859 | 0.423 | 0.0084 | 3.324 |
| ZNF345    | 0.00863 | 0.423 | 0.0113 | 0.438 |
| AK3       | 0.00864 | 0.423 | 0.0083 | 2.574 |
| LOC152742 | 0.00883 | 0.429 | 0.0096 | 0.219 |
| PA2G4     | 0.00885 | 0.429 | 0.0083 | 4.181 |
| KCMF1     | 0.00890 | 0.43  | 0.0088 | 2.791 |
| FOXP3     | 0.00895 | 0.43  | 0.0103 | 0.341 |
| SMN2      | 0.00902 | 0.431 | 0.0116 | 0.301 |
| PCTK2     | 0.00910 | 0.432 | 0.0074 | 0.236 |
| SERBP1    | 0.00922 | 0.436 | 0.011  | 4.659 |
| CA4       | 0.00935 | 0.437 | 0.0134 | 2.558 |
| CCDC23    | 0.00938 | 0.437 | 0.0095 | 2.866 |
| LRP8      | 0.00938 | 0.437 | 0.0118 | 0.487 |
| DYRK2     | 0.00949 | 0.437 | 0.0105 | 0.229 |
| FOS       | 0.00956 | 0.437 | 0.0103 | 1.622 |
| CXCL1     | 0.00959 | 0.437 | 0.0088 | 1.677 |
| RAB20     | 0.00961 | 0.437 | 0.0103 | 2.506 |
| TMEM194   | 0.00962 | 0.437 | 0.0107 | 0.485 |
| KIAA0895  | 0.00973 | 0.44  | 0.0101 | 0.317 |
| DDX19B    | 0.00988 | 0.445 | 0.0113 | 2.066 |
| ABHD5     | 0.00994 | 0.445 | 0.0105 | 2.483 |

<sup>1</sup>False discovery rate (FDR) was calculated with a univariate permutation test in BRB Array Tools.

<sup>2</sup>The number of random permutations was set to 10,000.

<sup>3</sup>Supplementray references for functions of top 20 genes are listed at the end of Supplementary material.

## Supplementary References

1. Morange PE, Oudot-Mellakh T, Cohen W, Germain M, Saut N, et al. (2011) KNG1 Ile581Thr and susceptibility to venous thrombosis. *Blood* 117: 3692-3964.
2. Allioli N, Vincent S, Vlaeminck-Guillem V, Decaussin-Petrucci M, Ragage F, et al. (2011) TM4SF1, a novel primary androgen receptor target gene over-expressed in human prostate cancer and involved in cell migration. *Prostate* 71: 1239-1250.
3. Zukauskas A, Merley A, Li D, Ang LH, Sciuto TE, et al. (2011) TM4SF1: a tetraspanin-like protein necessary for nanopodia formation and endothelial cell migration. *Angiogenesis* 14: 345-354.
4. Haurie V, Durrieu-Gaillard S, Dumay-Odelot H, Da Silva D, Rey C, et al. (2010) Two isoforms of human RNA polymerase III with specific functions in cell growth and transformation. *Proc Natl Acad Sci USA* 107: 4176-4181.
5. Lorenz P, Koczan D, Thiesen HJ (2001) Transcriptional repression mediated by the KRAB domain of the human C2H2 zinc finger protein Kox1/ZNF10 does not require histone deacetylation. *Biol Chem* 382: 637-644.
6. Cheong HK, Park JY, Kim EH, Lee C, Kim S, et al. (2003) Structure of the N-terminal extension of human aspartyl-tRNA synthetase: implications for its biological function. *Int J Biochem Cell Biol* 35: 1548-1557.
7. Hou X, Liu JE, Liu W, Liu CY, Liu ZY, et al. (2011) A new role of NUA1: directly phosphorylating p53 and regulating cell proliferation. *Oncogene* 30: 2933-2942.

8. Suzuki A, Lu J, Kusakai G, Kishimoto A, Ogura T, et al. (2004) ARK5 is a tumor invasion-associated factor downstream of Akt signaling. *Mol Cell Biol* 24: 3526-3535.
9. Kusakai G, Suzuki A, Ogura T, Miyamoto S, Ochiai A, et al. (2004) ARK5 expression in colorectal cancer and its implications for tumor progression. *Am J Pathol* 164: 987-995.
10. Castro MA, Dal-Pizzol F, Zdanov S, Soares M, Müller CB, et al. (2010) CFL1 expression levels as a prognostic and drug resistance marker in nonsmall cell lung cancer. *Cancer* 116: 3645-3655.
11. Peng XC, Gong FM, Zhao YW, Zhou LX, Xie YW, et al. (2011) Comparative proteomic approach identifies PKM2 and cofilin-1 as potential diagnostic, prognostic and therapeutic targets for pulmonary adenocarcinoma. *PLoS One* 6: e27309.
12. Gene Ontology [<http://www.geneontology.org>]
13. Sanada T, Takaesu G, Mashima R, Yoshida R, Kobayashi T, et al. (2008) FLN29 deficiency reveals its negative regulatory role in the Toll-like receptor (TLR) and retinoic acid-inducible gene I (RIG-I)-like helicase signaling pathway. *J Biol Chem* 283: 33858-33864.
14. McKinney C, Merriman TR (2012) Meta-analysis confirms a role for deletion in FCGR3B in autoimmune phenotypes. *Hum Mol Genet* 21: 2370-2376.
15. Morris DL, Roberts AL, Witherden AS, Tarzi R, Barros P, et al. (2010) Evidence for both copy number and allelic (NA1/NA2) risk at the FCGR3B locus in systemic lupus erythematosus. *Eur J Hum Genet* 18: 1027-1031.
16. Cox JJ, Reimann F, Nicholas AK, Thornton G, Roberts E, et al. (2006) An SCN9A channelopathy causes congenital inability to experience pain. *Nature* 444: 894-898.

17. Kuroda Y, Kuriyama H, Kihara S, Kishida K, Maeda N, et al. (2010) Insulin-mediated regulation of decidual protein induced by progesterone (DEPP) in adipose tissue and liver. *Horm Metab Res* 42: 173-177.
18. Watanabe H, Nonoguchi K, Sakurai T, Masuda T, Itoh K, et al. (2005) A novel protein Depp, which is induced by progesterone in human endometrial stromal cells activates Elk-1 transcription factor. *Mol Hum Reprod* 11: 471-476.
19. Németh J, Stein I, Haag D, Riehl A, Longerich T, et al. (2009) S100A8 and S100A9 are novel nuclear factor kappa B target genes during malignant progression of murine and human liver carcinogenesis. *Hepatology* 50: 1251-1262.
20. Källberg E, Vogl T, Liberg D, Olsson A, Björk P, et al. (2012) S100A9 interaction with TLR4 promotes tumor growth. *PLoS One* 7: e34207.
21. Kariuki SN, Franek BS, Kumar AA, Arrington J, Mikolaitis RA, et al. (2010) Trait-stratified genome-wide association study identifies novel and diverse genetic associations with serologic and cytokine phenotypes in systemic lupus erythematosus. *Arthritis Res Ther* 12: R151.
22. Togayachi A, Kozono Y, Kuno A, Ohkura T, Sato T, et al. (2010) Beta3GnT2 (B3GNT2), a major polylectosamine synthase: analysis of B3GNT2-deficient mice. *Methods Enzymol* 479: 185-204.
23. Li G, Liu J, Abu-Asab M, Masabumi S, Maru Y (2010) XPB induces C1D expression to counteract UV-induced apoptosis. *Mol Cancer Res* 8: 885-895.
24. Heiliger KJ, Hess J, Vitagliano D, Salerno P, Braselmann H, et al. (2012) Novel candidate genes of thyroid tumorigenesis identified in Trk-T1 transgenic mice. *Endocr Relat*

Cancer 19: 409-421

25. Nguyen TT, Ma LN, Slovak ML, Bangs CD, Cherry AM, et al. (2006) Identification of novel Runx1 (AML1) translocation partner genes SH3D19, YTHDF2, and ZNF687 in acute myeloid leukemia. *Genes Chromosomes Cancer* 45: 918-932.
