# Supplementary material for: Recurrence-associated pathways in hepatitis B virus-positive hepatocellular carcinoma
Source: PubMed Central journal article supplement (PMC4448317; doi:10.1186/s12864-015-1472-x), 2015-04-10
Supplement: 12864_2015_1472_MOESM2_ESM.pdf [file 12864_2015_1472_MOESM2_ESM.pdf]

**Table S2. Clinicopathological information on three HCC datasets**

| Clinical variables <sup>1</sup> | HBV-HCC                      | Public HBV-HCC <sup>2</sup>      | Public HCV-HCC <sup>2</sup> | P-value <sup>3</sup>   |
|---------------------------------|------------------------------|----------------------------------|-----------------------------|------------------------|
| Age (year)                      | 51.8±9.5                     | 50.7±10.8                        | 66.5±7.9                    |                        |
| Male number                     | 117 (82.4%)                  | 205 (86.9%)                      | 32 (74.4%)                  |                        |
| Viral infection                 |                              |                                  |                             |                        |
| HCV infection                   | 0 (0%)                       | 0 (0%)                           | 43 (100%)                   |                        |
| HBV infection                   | 142 (100%)                   | 236 (100%)                       | 0 (0%)                      |                        |
| Total bilirubin (mg/dl)         | 1.05±1.28                    | -                                | 0.80±0.35                   |                        |
| Alanine aminotransferase (IU/l) | 44.8±26.0                    | >50 IU/L<br>No. 99 (41.9%)       | 51.7±33.1                   |                        |
| Alpha-fetoprotein (ng/ml)       | >300 ng/ml<br>No. 48 (34.0%) | >300 ng/ml<br>No. 107 (46.1%)    | 345±962                     |                        |
| Tumor diameter (cm)             | 5.85±3.74                    | >5cm<br>No. 84 (35.7%)           | 2.95±1.37                   |                        |
| Number of tumors                | 1.14±0.35                    | Single nodule<br>No. 184 (78.0%) | 1.30±0.51                   |                        |
| Tumor differentiation           |                              |                                  |                             | 0.112                  |
| Well differentiated             | 11 (8.02%)                   | -                                | 6 (14.0%)                   |                        |
| Moderately differentiated       | 79 (57.7%)                   | -                                | 29 (67.4%)                  |                        |
| Poorly differentiated           | 47 (34.3%)                   | -                                | 8 (18.6%)                   |                        |
| Tumor stage                     |                              |                                  |                             | 1.064×10 <sup>-5</sup> |
| I                               | 32 (23.5%)                   | 92 (42.0%)                       | 8 (18.6%)                   |                        |
| II                              | 57 (41.9%)                   | 77 (35.2%)                       | 24 (55.8%)                  |                        |
| III                             | 37 (27.2%)                   | 50 (22.8%)                       | 10 (23.3%)                  |                        |
| IV                              | 10 (7.35%)                   | 0 (0%)                           | 1 (2.3%)                    |                        |
| Fibrosis stage                  |                              |                                  |                             | 0.566                  |
| 0                               | 8 (2.1%)                     | -                                | 0 (0%)                      |                        |
| 1                               | 11 (10.5%)                   | -                                | 3 (7.0%)                    |                        |
| 2                               | 21 (13.7%)                   | -                                | 6 (14.0%)                   |                        |
| 3                               | 40 (26.3%)                   | -                                | 12 (27.9%)                  |                        |
| 4                               | 61 (47.4%)                   | 218 (92.4%)                      | 22 (51.2%)                  |                        |
| Recurrence rate (within 2 yr)   | 69/142 (48.6%)               | 91/236 (38.6%)                   | 4/43 (9.30%)                |                        |

<sup>1</sup>Continuous variables are presented as mean values ± standard deviation or percentage of cases.

<sup>2</sup>Values in public HBV-HCC and HCV-HCC were obtained by modifying previously published tables [3,4].

<sup>3</sup>p-values were calculated using  $\chi^2$  test.
