# Supplementary material for: Recurrence-associated pathways in hepatitis B virus-positive hepatocellular carcinoma
Source: PubMed Central journal article supplement (PMC4448317; doi:10.1186/s12864-015-1472-x), 2015-04-10
Supplement: 12864_2015_1472_MOESM3_ESM.pdf [file 12864_2015_1472_MOESM3_ESM.pdf]

**Table S3. Pathways associated with recurrence in each HCC dataset.**

| Pathway                                              | HBV-HCC          |                           |                  |                      |             | Public HBV-HCC |              |       |         |             | Public HCV-HCC |              |       |         |             |
|------------------------------------------------------|------------------|---------------------------|------------------|----------------------|-------------|----------------|--------------|-------|---------|-------------|----------------|--------------|-------|---------|-------------|
|                                                      | PCA <sup>1</sup> | Weighted PCA <sup>2</sup> | FDR <sup>3</sup> | ROC AUC <sup>4</sup> | LS/KS       | PCA            | Weighted PCA | FDR   | ROC AUC | LS/KS       | PCA            | Weighted PCA | FDR   | ROC AUC | LS/KS       |
| ABC transporters                                     | 0.0650           | 0.0713                    | 0.082            |                      | 0.221/0.554 | 0.0549         | 0.0137       | 0.029 |         | 0.037/0.081 | <b>0.0081</b>  | 0.0113       | 0.086 | 0.861   | 0.122/0.735 |
| Adherens junction                                    | 0.2350           | 0.1332                    | 0.06             |                      | 0.144/0.296 | <b>0.0021</b>  | 0.0064       | 0.004 | 0.687   | 0.094/0.204 | 0.0266         | 0.029        | 0.13  |         | 0.199/0.171 |
| Amyotrophic lateral sclerosis                        | <b>0.0050</b>    | 0.0135                    | 0.106            | 0.725                | 0.043/0.343 | 0.0111         | 0.0316       | 0.017 |         | 0.095/0.299 | 0.0464         | 0.0487       | 0.146 |         | 0.585/0.718 |
| Apoptosis                                            | <b>0.0088</b>    | 0.021                     | 0.048            | 0.675                | 0.055/0.044 | <b>0.0003</b>  | 0.0045       | 0.002 | 0.747   | 0.002/0.002 | 0.0185         | 0.0169       | 0.07  |         | 0.406/0.652 |
| Arrhythmogenic right ventricular cardiomyopathy ARVC | 0.2005           | 0.1769                    | 0.091            |                      | 0.347/0.427 | <b>0.0032</b>  | 0.0126       | 0.006 | 0.685   | 0.02/0.186  | 0.0207         | 0.0209       | 0.119 |         | 0.482/0.412 |
| AT1R pathway                                         | 0.0438           | 0.0571                    | 0.038            |                      | 0.045/0.15  | <b>0.0017</b>  | 0.0064       | 0.005 | 0.746   | 0.004/0.051 | 0.0463         | 0.0635       | 0.158 |         | 0.501/0.953 |
| Axon guidance (KEGG)                                 | <b>0.004</b>     | 0.0133                    | 0.015            | 0.677                | 0.008/0.011 | <b>0.0003</b>  | 0.0013       | 0.008 | 0.700   | 0.068/0.452 | <b>0.0062</b>  | 0.0061       | 0.094 | 0.877   | 0.472/0.801 |
| Axon guidance (Reactome)                             | <b>0.0073</b>    | 0.0199                    | 0.025            | 0.705                | 0.031/0.099 | <b>0.0007</b>  | 0.0029       | 0.005 | 0.736   | 0.062/0.469 | <b>0.0065</b>  | 0.0053       | 0.084 | 0.810   | 0.528/0.885 |
| Calcium signaling pathway                            | <b>0.0098</b>    | 0.0892                    | 0.067            | 0.691                | 0.255/0.863 | <b>0.0002</b>  | 0.0019       | 0.006 | 0.738   | 0.009/0.028 | 0.0123         | 0.0072       | 0.105 |         | 0.549/0.927 |
| CDT1 association with the CDC6 ORC origin comple     | 0.1074           | 0.1034                    | 0.075            |                      | 0.25/0.558  | <b>0.0023</b>  | 0.005        | 0.03  | 0.726   | 0.014/0.101 | 0.0617         | 0.036        | 0.154 |         | 0.683/0.628 |
| Cell adhesion molecules cams                         | <b>0.0035</b>    | 0.0111                    | 0.062            | 0.677                | 0.156/0.561 | <b>0.0066</b>  | 0.0177       | 0.018 | 0.711   | 0.095/0.202 | 0.0175         | 0.013        | 0.152 |         | 0.756/0.184 |
| Cell death signalling via NRAGE, NRIF and NADE       | 0.0319           | 0.0563                    | 0.097            |                      | 0.226/0.292 | <b>0.003</b>   | 0.0121       | 0.006 | 0.653   | 0.052/0.58  | 0.0225         | 0.02         | 0.124 |         | 0.631/0.67  |
| Cell junction organization                           | <b>0.0068</b>    | 0.0126                    | 0.084            | 0.686                | 0.031/0.16  | <b>0.0075</b>  | 0.0296       | 0.003 | 0.684   | 0.009/0.02  | 0.0193         | 0.0167       | 0.111 |         | 0.749/0.822 |
| Cell surface interactions at the vascular wall       | <b>0.0055</b>    | 0.0199                    | 0.053            | 0.726                | 0.053/0.27  | <b>0.0018</b>  | 0.0151       | 0.018 | 0.705   | 0.023/0.031 | 0.0122         | 0.0063       | 0.129 |         | 0.632/0.982 |
| Chemokine receptors bind chemokines                  | <b>0.0057</b>    | 0.0408                    | 0.044            | 0.658                | 0.05/0.512  | <b>0.0004</b>  | 0.0013       | 0.001 | 0.743   | 0.009/0.015 | 0.0658         | 0.0815       | 0.204 |         | 0.676/0.795 |
| Chemokine signaling pathway                          | <b>0.0026</b>    | 0.0237                    | 0.019            | 0.716                | 0.023/0.027 | <b>0.0043</b>  | 0.0007       | 0.003 | 0.745   | 0.002/0.01  | 0.0153         | 0.0168       | 0.11  |         | 0.38/0.437  |
| Class A1 rhodopsin like receptors                    | <b>0.0022</b>    | 0.0047                    | 0.019            | 0.680                | 0.022/0.222 | <b>0.0002</b>  | 0.0147       | 0.004 | 0.695   | 0.001/0.017 | 0.0122         | 0.0102       | 0.112 |         | 0.678/0.467 |
| Cytokine cytokine receptor interaction               | <b>0.0022</b>    | 0.0134                    | 0.042            | 0.695                | 0.057/0.227 | <b>0.0019</b>  | 0.0107       | 0.002 | 0.694   | 0.012/0.006 | 0.0172         | 0.0233       | 0.116 |         | 0.719/0.923 |
| Dilated cardiomyopathy                               | 0.0779           | 0.1382                    | 0.074            |                      | 0.276/0.545 | <b>0.0015</b>  | 0.0171       | 0.004 | 0.686   | 0.004/0.018 | 0.0168         | 0.0166       | 0.149 |         | 0.59/0.366  |
| DNA repair                                           | 0.042            | 0.0577                    | 0.056            |                      | 0.451/0.945 | <b>0.0027</b>  | 0.0085       | 0.01  | 0.704   | 0.01/0.038  | 0.0105         | 0.0065       | 0.113 |         | 0.757/0.519 |
| DNA replication pre initiation                       | 0.0407           | 0.1076                    | 0.074            |                      | 0.233/0.524 | <b>0.0023</b>  | 0.0044       | 0.02  | 0.728   | 0.015/0.009 | 0.0443         | 0.0271       | 0.143 |         | 0.746/0.558 |
| Downstream events in GPCR signaling                  | <b>0.0012</b>    | 0.0039                    | 0.027            | 0.740                | 0.065/0.347 | <b>0.0001</b>  | 0.0067       | 0.002 | 0.720   | 0.003/0.016 | <b>0.0055</b>  | 0.0031       | 0.086 | 0.961   | 0.629/0.411 |
| Downstream signaling of activated FGFR               | 0.1913           | 0.1598                    | 0.088            |                      | 0.204/0.556 | <b>0.0007</b>  | 0.0051       | 0.002 | 0.707   | 0.002/0.013 | 0.1596         | 0.1596       | 0.135 |         | 0.903/0.728 |
| Endocytosis                                          | <b>0.0074</b>    | 0.0315                    | 0.031            | 0.629                | 0.273/0.198 | <b>0.0017</b>  | 0.0019       | 0.004 | 0.696   | 0.004/0.033 | <b>0.007</b>   | 0.0081       | 0.089 | 0.852   | 0.493/0.678 |
| ERBB signaling pathway                               | <b>0.002</b>     | 0.0082                    | 0.048            | 0.729                | 0.086/0.413 | <b>0.0017</b>  | 0.0075       | 0.005 | 0.680   | 0.011/0.031 | 0.0315         | 0.0209       | 0.103 |         | 0.776/0.731 |
| Fc gamma R-mediated phagocytosis                     | <b>0.0074</b>    | 0.0117                    | 0.042            | 0.676                | 0.067/0.294 | 0.0139         | 0.0413       | 0.019 |         | 0.079/0.102 | 0.0219         | 0.0233       | 0.13  |         | 0.348/0.48  |
| Focal adhesion                                       | <b>0.004</b>     | 0.0316                    | 0.013            | 0.656                | 0.015/0.035 | <b>0.0007</b>  | 0.0096       | 0.009 | 0.738   | 0.03/0.124  | 0.01           | 0.0063       | 0.09  |         | 0.571/0.996 |
| Formation of platelet plug                           | <b>0.0012</b>    | 0.0124                    | 0.021            | 0.718                | 0.006/0.016 | <b>0.0037</b>  | 0.0485       | 0.002 | 0.711   | 0.012/0.004 | <b>0.0089</b>  | 0.0231       | 0.103 | 0.707   | 0.622/0.853 |
| Further platelet releasate                           | <b>0.0051</b>    | 0.0145                    | 0.008            | 0.680                | 0/0.008     |                |              |       |         | 0.521/0.889 | 0.0539         | 0.0601       | 0.26  |         | 0.35/0.412  |
| G alpha i signalling events                          | <b>0.0049</b>    | 0.0045                    | 0.007            | 0.660                | 0.023/0.161 | 0.0138         | 0.0033       | 0.003 |         | 0.029/0.144 | 0.0165         | 0.0198       | 0.106 |         | 0.653/0.4   |
| G alpha q signalling events                          | <b>0.0051</b>    | 0.0144                    | 0.064            | 0.680                | 0.168/0.577 | <b>0.0001</b>  | 0.003        | 0.003 | 0.725   | 0.001/0.014 | 0.019          | 0.0171       | 0.098 |         | 0.659/0.263 |
| G alpha s signalling events                          | 0.0364           | 0.0284                    | 0.028            |                      | 0.05/0.254  | <b>0.0024</b>  | 0.0125       | 0.006 | 0.671   | 0.023/0.055 | 0.0188         | 0.0185       | 0.11  |         | 0.4/0.931   |
| Gap junction                                         | 0.0959           | 0.0423                    | 0.055            |                      | 0.153/0.587 | <b>0.001</b>   | 0.0086       | 0.006 | 0.653   | 0.018/0.073 | 0.0181         | 0.0149       | 0.146 |         | 0.508/0.99  |
| Gleevec pathway                                      | <b>0.0055</b>    | 0.0182                    | 0.016            | 0.722                | 0.002/0.092 | 0.0561         | 0.0165       | 0.03  |         | 0.01/0.019  | 0.081          | 0.0926       | 0.133 |         | 0.403/0.268 |
| Glucose and other sugar slc transporters             | <b>0.0057</b>    | 0.0159                    | 0.074            | 0.676                | 0.227/0.464 | 0.0348         | 0.0318       | 0.013 |         | 0.016/0.041 | 0.011          | 0.0129       | 0.126 |         | 0.419/0.81  |
| Glucose transport                                    | 0.1015           | 0.1562                    | 0.114            |                      | 0.819/0.615 | 0.0139         | 0.0195       | 0.01  |         | 0.013/0.008 | <b>0.0051</b>  | 0.0052       | 0.143 | 0.763   | 0.5/0.961   |

| Pathway                                                                  | PCA           | Weighted PCA <sup>2</sup> | FDR   | ROC AUC     | LS/KS       | PCA           | Weighted PCA <sup>2</sup> | FDR   | ROC AUC | LS/KS       | PCA           | Weighted PCA <sup>2</sup> | FDR   | ROC AUC     | LS/KS       |
|--------------------------------------------------------------------------|---------------|---------------------------|-------|-------------|-------------|---------------|---------------------------|-------|---------|-------------|---------------|---------------------------|-------|-------------|-------------|
| Glycerophospholipid metabolism                                           | 0.1388        | 0.1397                    | 0.07  | 0.361/0.881 |             | <b>0.003</b>  | 0.0109                    | 0.006 | 0.688   | 0/0         | 0.0475        | 0.046                     | 0.12  | 0.908/0.547 |             |
| Glycosphingolipid biosynthesis ganglio series                            | 0.1407        | 0.1407                    | 0.185 | 0.227/0.267 |             |               |                           |       |         | 0.891/0.244 | <b>0.0005</b> | 0.0012                    | 0.087 | 0.856       | 0.006/0.216 |
| Glycosphingolipid biosynthesis globo series                              | 0.024         | 0.0362                    | 0.03  | 0.009/0.205 |             | 0.0775        | 0.1131                    | 0.069 |         | 0.13/0.392  | <b>0.0011</b> | 0.001                     | 0.053 | 0.872       | 0.008/0.284 |
| GPCR ligand binding                                                      | <b>0.002</b>  | 0.0051                    | 0.005 | 0.708       | 0.038/0.187 | <b>0.0001</b> | 0.0103                    | 0.004 | 0.725   | 0.007/0.019 | <b>0.0089</b> | 0.0093                    | 0.084 | 0.912       | 0.652/0.669 |
| Hematopoietic cell lineage                                               | 0.0638        | 0.1                       | 0.142 | 0.659/0.559 |             | <b>0.0018</b> | 0.018                     | 0.008 | 0.692   | 0.039/0.076 | 0.0414        | 0.0537                    | 0.142 | 0.665/0.852 |             |
| Hemostasis                                                               | <b>0.0005</b> | 0.0098                    | 0.016 | 0.736       | 0.014/0.029 | <b>0.0031</b> | 0.0641                    | 0.007 | 0.711   | 0.015/0.006 | <b>0.009</b>  | 0.0066                    | 0.101 | 0.585       | 0.709/0.703 |
| HIF pathway                                                              | <b>0.0089</b> | 0.0208                    | 0.019 | 0.674       | 0/0.004     | <b>0.0067</b> | 0.019                     | 0.02  | 0.656   | 0.004/0.038 | 0.1967        | 0.1967                    | 0.285 | 0.762/0.807 |             |
| HIV infection                                                            | <b>0.0091</b> | 0.0516                    | 0.036 | 0.668       | 0.427/0.5   | <b>0.0034</b> | 0.0037                    | 0.006 | 0.678   | 0.011/0.063 | <b>0.0059</b> | 0.0027                    | 0.091 | 0.705       | 0.31/0.705  |
| Host interactions of HIV factors                                         | <b>0.0023</b> | 0.0412                    | 0.049 | 0.660       | 0.341/0.642 | <b>0.0024</b> | 0.0049                    | 0.008 | 0.690   | 0.003/0.045 | 0.0104        | 0.0049                    | 0.121 | 0.291/0.559 |             |
| Hypertrophic cardiomyopathy                                              | 0.195         | 0.2127                    | 0.075 | 0.459/0.895 |             | <b>0.0025</b> | 0.0182                    | 0.007 | 0.688   | 0.008/0.039 | 0.0185        | 0.0282                    | 0.121 | 0.658/0.498 |             |
| Immunoregulatory interactions between a lymphoid and a non lymphoid cell | <b>0.01</b>   | 0.0312                    | 0.015 | 0.622       | 0.045/0.055 | 0.0159        | 0.0413                    | 0.035 |         | 0.065/0.122 | 0.0336        | 0.0433                    | 0.194 | 0.359/0.403 |             |
| Innate immunity signaling                                                | <b>0.0081</b> | 0.0292                    | 0.021 | 0.690       | 0.02/0.056  | 0.0403        | 0.006                     | 0.009 |         | 0.072/0.503 | <b>0.009</b>  | 0.0071                    | 0.094 | 0.860       | 0.57/0.676  |
| Inorganic cation anion SLC transporters                                  | 0.0581        | 0.0975                    | 0.089 | 0.442/0.911 |             | <b>0.0043</b> | 0.0208                    | 0.006 | 0.657   | 0.001/0.009 | <b>0.0075</b> | 0.0069                    | 0.104 | 0.869       | 0.636/0.669 |
| Insulin signaling pathway                                                | <b>0.009</b>  | 0.0403                    | 0.008 | 0.652       | 0.095/0.171 | <b>0.0047</b> | 0.0137                    | 0.01  | 0.668   | 0.005/0.026 | 0.0122        | 0.0159                    | 0.097 | 0.717/0.704 |             |
| Integrin cell surface interactions                                       | <b>0.0031</b> | 0.0268                    | 0.009 | 0.720       | 0.016/0.04  | <b>0.0023</b> | 0.0115                    | 0.003 | 0.725   | 0.008/0.021 | 0.0274        | 0.028                     | 0.129 | 0.845/0.134 |             |
| Integrin pathway                                                         | 0.1287        | 0.0409                    | 0.037 | 0.002/0.026 |             | <b>0.0035</b> | 0.0113                    | 0.01  | 0.7317  | 0.014/0.096 | 0.0209        | 0.0283                    | 0.129 | 0.408/0.763 |             |
| IRS related events                                                       | 0.2007        | 0.2175                    | 0.077 | 0.267/0.372 |             | <b>0.0012</b> | 0.0103                    | 0.007 | 0.6965  | 0.037/0.376 | 0.0318        | 0.0364                    | 0.11  | 0.823/0.601 |             |
| Keratinocyte pathway                                                     | <b>0.0064</b> | 0.0223                    | 0.019 | 0.671       | 0.032/0.272 | 0.012         | 0.0221                    | 0.01  |         | 0.005/0.099 | 0.0268        | 0.0301                    | 0.168 | 0.203/0.292 |             |
| Leishmania infection                                                     | <b>0.0042</b> | 0.0205                    | 0.01  | 0.730       | 0.006/0.014 | 0.0536        | 0.011                     | 0.023 |         | 0.192/0.48  | 0.0247        | 0.0254                    | 0.151 | 0.772/0.427 |             |
| Leukocyte transendothelial migration                                     | 0.0496        | 0.0517                    | 0.067 | 0.078/0.524 |             | 0.0214        | 0.009                     | 0.006 |         | 0.011/0.02  | <b>0.0082</b> | 0.0109                    | 0.131 | 0.931       | 0.437/0.629 |
| Lysosome                                                                 | <b>0.0026</b> | 0.0375                    | 0.06  | 0.694       | 0.277/0.891 | <b>0.0037</b> | 0.021                     | 0.003 | 0.684   | 0.096/0.201 | <b>0.0037</b> | 0.0047                    | 0.08  | 0.863       | 0.805/0.693 |
| M G1 transition                                                          | 0.1161        | 0.1106                    | 0.083 | 0.248/0.506 |             | <b>0.0019</b> | 0.0036                    | 0.029 | 0.726   | 0.011/0.011 | 0.0445        | 0.0268                    | 0.156 | 0.62/0.763  |             |
| MAP kinases activation in TLR cascade                                    | <b>0.0082</b> | 0.0195                    | 0.007 | 0.681       | 0.012/0.105 | 0.0296        | 0.057                     | 0.011 |         | 0.699/0.556 |               |                           |       | 0.555/0.878 |             |
| MAPK signaling pathway                                                   | <b>0.003</b>  | 0.011                     | 0.011 | 0.702       | 0.032/0.044 | <b>0.0006</b> | 0.0119                    | 0.001 | 0.718   | 0.018/0.085 | 0.0119        | 0.0117                    | 0.076 | 0.838       | 0.857/0.712 |
| Melanogenesis                                                            | 0.1073        | 0.0794                    | 0.088 | 0.267/0.623 |             | <b>0.003</b>  | 0.0231                    | 0.003 | 0.633   | 0.033/0.137 | 0.0158        | 0.0149                    | 0.085 | 0.42/0.638  |             |
| Membrane trafficking                                                     | <b>0.0067</b> | 0.0868                    | 0.064 | 0.669       | 0.226/0.372 | <b>0.0036</b> | 0.0065                    | 0.013 | 0.670   | 0.21/0.804  | 0.0171        | 0.0146                    | 0.096 | 0.637/0.584 |             |
| MET pathway                                                              | 0.0116        | 0.013                     | 0.009 | 0.002/0.028 |             | <b>0.0026</b> | 0.0116                    | 0.006 | 0.718   | 0.009/0.015 | 0.0656        | 0.0555                    | 0.167 | 0.795/0.93  |             |
| Metabolism of amino acids                                                | <b>0.007</b>  | 0.0215                    | 0.041 | 0.6597      | 0.368/0.728 | 0.0816        | 0.0428                    | 0.011 |         | 0.006/0.005 | 0.0206        | 0.0177                    | 0.11  | 0.874/0.287 |             |
| Metabolism of lipids and lipoproteins                                    | <b>0.0015</b> | 0.0102                    | 0.014 | 0.700       | 0.035/0.05  | 0.0517        | 0.0356                    | 0.009 |         | 0.011/0.008 | <b>0.0045</b> | 0.0029                    | 0.085 | 0.868       | 0.459/0.946 |
| Metabolism of RNA                                                        | 0.0181        | 0.0515                    | 0.04  | 0.204/0.812 |             | 0.0113        | 0.038                     | 0.011 |         | 0.018/0.045 | <b>0.0078</b> | 0.0042                    | 0.117 | 0.800       | 0.296/0.405 |
| Natural killer cell mediated cytotoxicity                                | <b>0.0021</b> | 0.0114                    | 0.044 | 0.696       | 0.229/0.516 | <b>0.0006</b> | 0.0031                    | 0.011 | 0.726   | 0.024/0.017 | 0.0208        | 0.0298                    | 0.145 | 0.255/0.158 |             |
| Neuroactive ligand receptor interaction                                  | 0.1862        | 0.2184                    | 0.06  | 0.495/0.509 |             | <b>0.0003</b> | 0.0068                    | 0.004 | 0.711   | 0.04/0.11   | 0.0128        | 0.0118                    | 0.104 | 0.848/0.484 |             |
| Neurotrophin signaling pathway                                           | <b>0.0028</b> | 0.0183                    | 0.034 | 0.679       | 0.269/0.843 | <b>0.003</b>  | 0.0101                    | 0.006 | 0.685   | 0.053/0.215 | 0.0137        | 0.016                     | 0.087 | 0.523/0.881 |             |
| Opioid signalling                                                        | 0.1433        | 0.0689                    | 0.046 | 0.018/0.021 |             | <b>0.0078</b> | 0.0395                    | 0.005 | 0.658   | 0.055/0.135 | <b>0.0091</b> | 0.0097                    | 0.126 | 0.539       | 0.194/0.375 |
| Orc1 removal from chromatin                                              | 0.0482        | 0.0978                    | 0.046 | 0.137/0.242 |             | <b>0.002</b>  | 0.0042                    | 0.031 | 0.726   | 0.012/0.038 | 0.0539        | 0.033                     | 0.163 | 0.727/0.506 |             |
| P75 NTR receptor mediated signalling                                     | 0.0207        | 0.0388                    | 0.045 | 0.235/0.082 |             | <b>0.0027</b> | 0.0118                    | 0.008 | 0.682   | 0.008/0.089 | 0.0155        | 0.0107                    | 0.092 | 0.679/0.46  |             |
| PAR1 pathway                                                             | 0.1196        | 0.1288                    | 0.075 | 0.289/0.345 |             | <b>0.004</b>  | 0.0109                    | 0.006 | 0.645   | 0.033/0.16  | 0.0178        | 0.0111                    | 0.175 | 0.434/0.938 |             |
| Pathways in cancer                                                       | <b>0.0026</b> | 0.0281                    | 0.008 | 0.726       | 0.027/0.159 | <b>0.0012</b> | 0.0262                    | 0     | 0.692   | 0.003/0.003 | <b>0.0059</b> | 0.0028                    | 0.064 | 0.796       | 0.577/0.708 |

| Pathway                                                                   | PCA           | Weighted PCA <sup>*</sup> | FDR   | ROC AUC | LS/KS       | PCA           | Weighted PCA <sup>*</sup> | FDR   | ROC AUC | LS/KS       | PCA           | Weighted PCA <sup>*</sup> | FDR   | ROC AUC | LS/KS       |
|---------------------------------------------------------------------------|---------------|---------------------------|-------|---------|-------------|---------------|---------------------------|-------|---------|-------------|---------------|---------------------------|-------|---------|-------------|
| Peptide ligand binding receptors                                          | 0.0267        | 0.0063                    | 0.046 |         | 0.005/0.129 | <b>0.0026</b> | 0.0074                    | 0.006 | 0.661   | 0.006/0.015 | 0.0302        | 0.0428                    | 0.125 |         | 0.823/0.672 |
| PI3K cascade                                                              | 0.1965        | 0.1908                    | 0.099 |         | 0.161/0.4   | <b>0.0013</b> | 0.01                      | 0.006 | 0.700   | 0.003/0.041 | 0.1613        | 0.1613                    | 0.171 |         | 0.875/0.778 |
| Platelet activation                                                       | <b>0.0012</b> | 0.0083                    | 0.017 | 0.727   | 0.012/0.034 | <b>0.0093</b> | 0.042                     | 0.016 | 0.693   | 0.024/0.009 | <b>0.0081</b> | 0.0227                    | 0.101 | 0.694   | 0.58/0.716  |
| Platelet de-granulation                                                   | <b>0.0012</b> | 0.0053                    | 0.009 | 0.699   | 0.002/0.006 | 0.0111        | 0.0764                    | 0.016 |         | 0.014/0.005 | 0.0261        | 0.0424                    | 0.123 |         | 0.563/0.613 |
| Processing of capped intron containing pre mRNA                           | <b>0.0095</b> | 0.0457                    | 0.046 | 0.670   | 0.182/0.491 | 0.0505        | 0.1329                    | 0.013 |         | 0.027/0.029 | 0.01          | 0.0071                    | 0.091 |         | 0.622/0.746 |
| Prostate cancer                                                           | 0.0645        | 0.0597                    | 0.069 |         | 0.231/0.603 | <b>0.0026</b> | 0.0042                    | 0.008 | 0.697   | 0.028/0.167 | 0.0203        | 0.0138                    | 0.095 |         | 0.472/0.963 |
| PYK2 pathway                                                              | <b>0.0035</b> | 0.0078                    | 0.004 | 0.659   | 0.023/0.244 | 0.0143        | 0.0362                    | 0.02  |         | 0.013/0.142 | 0.0531        | 0.0612                    | 0.217 |         | 0.387/0.325 |
| Pyrimidine metabolism                                                     | 0.0456        | 0.0334                    | 0.036 |         | 0.098/0.327 | <b>0.0041</b> | 0.0159                    | 0.009 | 0.647   | 0.013/0.107 | 0.013         | 0.0203                    | 0.102 |         | 0.896/0.431 |
| Pyruvate metabolism                                                       | <b>0.0077</b> | 0.0321                    | 0.011 | 0.674   | 0.022/0.046 | 0.1295        | 0.0378                    | 0.036 |         | 0.002/0.001 | 0.0328        | 0.0203                    | 0.222 |         | 0.912/0.231 |
| Pyruvate metabolism and TCA cycle                                         | 0.0148        | 0.023                     | 0.146 |         | 0.065/0.623 | 0.085         | 0.0497                    | 0.043 |         | 0.086/0.273 | <b>0.003</b>  | 0.0036                    | 0.17  | 0.945   | 0.526/0.934 |
| Regulation of actin cytoskeleton                                          | <b>0.0025</b> | 0.0294                    | 0.037 | 0.677   | 0.04/0.186  | <b>0.0004</b> | 0.0051                    | 0.007 | 0.692   | 0.19/0.7    | <b>0.0098</b> | 0.0093                    | 0.091 | 0.812   | 0.521/0.854 |
| Regulation of glucokinase by glucokinase regulatory protein               | 0.1224        | 0.1714                    | 0.117 |         | 0.801/0.529 | 0.0294        | 0.0353                    | 0.023 |         | 0.018/0.039 | <b>0.0065</b> | 0.0062                    | 0.186 | 0.763   | 0.35/0.616  |
| Renal cell carcinoma                                                      | <b>0.0072</b> | 0.0322                    | 0.056 | 0.670   | 0.071/0.173 | <b>0.0029</b> | 0.0187                    | 0.005 | 0.675   | 0.017/0.064 | 0.0212        | 0.0207                    | 0.106 |         | 0.625/0.832 |
| REV mediated nuclear export of HIV1 RNA                                   | 0.0975        | 0.1422                    | 0.097 |         | 0.825/0.835 | 0.0409        | 0.0253                    | 0.03  |         | 0.014/0.033 | <b>0.0052</b> | 0.0053                    | 0.154 | 0.763   | 0.42/0.665  |
| RHO GTPase cycle                                                          | 0.026         | 0.0332                    | 0.06  |         | 0.105/0.388 | <b>0.0019</b> | 0.0121                    | 0.004 | 0.653   | 0.094/0.221 | 0.0112        | 0.0071                    | 0.105 |         | 0.709/0.4   |
| RIG I like receptor signaling pathway                                     | 0.0602        | 0.0887                    | 0.068 |         | 0.122/0.1   | <b>0.0007</b> | 0.0013                    | 0.009 | 0.730   | 0.028/0.221 | 0.0229        | 0.0289                    | 0.114 |         | 0.349/0.845 |
| RNA degradation                                                           | <b>0.0071</b> | 0.021                     | 0.07  | 0.679   | 0.086/0.599 | 0.0253        | 0.0425                    | 0.014 |         | 0.247/0.68  | 0.0123        | 0.0132                    | 0.117 |         | 0.402/0.356 |
| S phase                                                                   | <b>0.01</b>   | 0.0786                    | 0.053 | 0.645   | 0.273/0.744 | <b>0.0025</b> | 0.0101                    | 0.023 | 0.682   | 0.039/0.043 | 0.0264        | 0.0178                    | 0.129 |         | 0.806/0.337 |
| SCF beta TRCP mediated degradation of EMI1                                | 0.1029        | 0.1103                    | 0.092 |         | 0.211/0.348 | <b>0.0024</b> | 0.0035                    | 0.03  | 0.716   | 0.011/0.091 | 0.0583        | 0.0398                    | 0.169 |         | 0.749/0.594 |
| Signaling by EGFR                                                         | 0.1377        | 0.1934                    | 0.125 |         | 0.368/0.367 | <b>0.002</b>  | 0.0094                    | 0.008 | 0.691   | 0.018/0.105 | 0.0536        | 0.0565                    | 0.124 |         | 0.727/0.996 |
| Signaling by WNT                                                          | 0.1633        | 0.0324                    | 0.074 |         | 0.128/0.242 | <b>0.0025</b> | 0.0042                    | 0.016 | 0.721   | 0.009/0.192 | 0.0342        | 0.0449                    | 0.137 |         | 0.647/0.859 |
| Signaling in immune system                                                | <b>0.0018</b> | 0.0133                    | 0.026 | 0.717   | 0.048/0.118 | <b>0.0002</b> | 0.0044                    | 0.01  | 0.713   | 0.029/0.084 | <b>0.0054</b> | 0.0018                    | 0.111 | 0.920   | 0.626/0.634 |
| Signalling by NGF                                                         | <b>0.0031</b> | 0.0377                    | 0.034 | 0.701   | 0.12/0.234  | <b>0.0006</b> | 0.0122                    | 0.002 | 0.723   | 0.005/0.014 | <b>0.0059</b> | 0.0076                    | 0.072 | 0.635   | 0.649/0.509 |
| SLC mediated transmembrane transport                                      | <b>0.0029</b> | 0.0195                    | 0.053 | 0.718   | 0.253/0.516 | <b>0.0099</b> | 0.009                     | 0.006 | 0.674   | 0.003/0.007 | <b>0.0049</b> | 0.0051                    | 0.1   | 0.811   | 0.489/0.983 |
| Sphingolipid metabolism                                                   | 0.1729        | 0.1729                    | 0.122 |         | 0.522/0.686 | 0.062         | 0.0359                    | 0.041 |         | 0.045/0.269 | <b>0.0055</b> | 0.004                     | 0.073 | 0.844   | 0.034/0.281 |
| Striated muscle contraction                                               | 0.1193        | 0.1193                    | 0.18  |         | 0.423/0.918 | <b>0.0049</b> | 0.0088                    | 0.019 | 0.694   | 0.007/0.123 | 0.0486        | 0.0298                    | 0.264 |         | 0.174/0.202 |
| Synthesis of DNA                                                          | 0.0594        | 0.0898                    | 0.063 |         | 0.211/0.606 | <b>0.0009</b> | 0.005                     | 0.021 | 0.711   | 0.04/0.067  | 0.06          | 0.0404                    | 0.147 |         | 0.887/0.238 |
| TGF beta signaling pathway                                                | 0.2864        | 0.2909                    | 0.089 |         | 0.136/0.077 | <b>0.0009</b> | 0.01                      | 0.005 | 0.714   | 0.013/0.022 | 0.0146        | 0.0201                    | 0.094 |         | 0.522/0.686 |
| Tight junction                                                            | <b>0.0074</b> | 0.0248                    | 0.052 | 0.727   | 0.291/0.829 | <b>0.0044</b> | 0.017                     | 0.006 | 0.693   | 0.02/0.185  | 0.0103        | 0.0107                    | 0.096 |         | 0.271/0.159 |
| Toll like receptor 3 cascade                                              | <b>0.0069</b> | 0.0256                    | 0.014 | 0.703   | 0.007/0.02  | <b>0.0048</b> | 0.0148                    | 0.011 | 0.628   | 0.405/0.403 | 0.0155        | 0.0162                    | 0.118 |         | 0.297/0.853 |
| Toll like receptor signaling pathway                                      | <b>0.0019</b> | 0.0101                    | 0.005 | 0.698   | 0.004/0.029 | <b>0.0032</b> | 0.0012                    | 0.006 | 0.624   | 0.035/0.322 | 0.0291        | 0.0276                    | 0.106 |         | 0.857/0.582 |
| Toll receptor cascades                                                    | <b>0.0077</b> | 0.0307                    | 0.012 | 0.693   | 0.008/0.051 | <b>0.0012</b> | 0.0033                    | 0.005 | 0.688   | 0.051/0.591 | 0.015         | 0.011                     | 0.118 |         | 0.54/0.942  |
| TPO pathway                                                               | <b>0.0086</b> | 0.0486                    | 0.056 | 0.694   | 0.012/0.033 | <b>0.0046</b> | 0.0151                    | 0.009 | 0.643   | 0.002/0.002 | 0.0679        | 0.0732                    | 0.109 |         | 0.688/0.833 |
| TRAF6 mediated induction of the antiviral cytokine IFN alpha beta cascade | <b>0.0088</b> | 0.029                     | 0.016 | 0.668   | 0.009/0.043 | <b>0.0078</b> | 0.014                     | 0.013 | 0.650   | 0.564/0.295 | 0.0277        | 0.0297                    | 0.132 |         | 0.592/0.945 |
| Transmembrane transport of small molecules                                | <b>0.0015</b> | 0.0089                    | 0.033 | 0.749   | 0.248/0.475 | <b>0.0049</b> | 0.0495                    | 0.004 | 0.668   | 0/0         | <b>0.0032</b> | 0.0029                    | 0.079 | 0.883   | 0.477/0.975 |
| Transport of the SLBP independent mature mRNA                             | 0.055         | 0.0835                    | 0.082 |         | 0.547/0.936 | 0.0578        | 0.0366                    | 0.032 |         | 0.068/0.109 | <b>0.0049</b> | 0.0048                    | 0.172 | 0.763   | 0.469/0.937 |
| Trka signalling from the plasma membrane                                  | 0.0547        | 0.0481                    | 0.029 |         | 0.062/0.223 | <b>0.0014</b> | 0.0126                    | 0.004 | 0.7001  | 0.006/0.005 | 0.0215        | 0.0305                    | 0.084 |         | 0.826/0.398 |
| Ubiquitin mediated proteolysis                                            | 0.2615        | 0.2045                    | 0.051 |         | 0.269/0.122 | <b>0.0025</b> | 0.0128                    | 0.002 | 0.680   | 0.01/0.027  | 0.014         | 0.0071                    | 0.081 |         | 0.738/0.809 |

| Pathway                                  | PCA           | Weighted<br>PCA <sup>2</sup> | FDR   | ROC<br>AUC | LS/KS       | PCA           | Weighted<br>PCA <sup>2</sup> | FDR   | ROC<br>AUC | LS/KS       | PCA          | Weighted<br>PCA <sup>2</sup> | FDR   | ROC<br>AUC | LS/KS       |
|------------------------------------------|---------------|------------------------------|-------|------------|-------------|---------------|------------------------------|-------|------------|-------------|--------------|------------------------------|-------|------------|-------------|
| Vascular smooth muscle contraction       | <b>0.0059</b> | 0.0523                       | 0.022 | 0.666      | 0.096/0.109 | <b>0.0027</b> | 0.0271                       | 0.008 | 0.696      | 0.011/0.017 | 0.0165       | 0.017                        | 0.127 |            | 0.356/0.823 |
| Vasopressin regulated water reabsorption | 0.0556        | 0.0732                       | 0.099 |            | 0.21/0.508  | <b>0.0014</b> | 0.0068                       | 0.006 | 0.683      | 0.002/0.161 | 0.0527       | 0.0596                       | 0.123 |            | 0.828/0.691 |
| VEGF pathway                             | <b>0.0032</b> | 0.0325                       | 0.029 | 0.648      | 0.013/0.122 | <b>0.0044</b> | 0.0139                       | 0.007 | 0.666      | 0.001/0.04  | 0.0929       | 0.0875                       | 0.161 |            | 0.63/0.894  |
| VEGF signaling pathway                   | 0.1096        | 0.0864                       | 0.041 |            | 0.06/0.082  | <b>0.004</b>  | 0.0201                       | 0.003 | 0.668      | 0.038/0.133 | 0.0487       | 0.0608                       | 0.139 |            | 0.779/0.723 |
| Vibrio cholerae infection                | 0.2015        | 0.0748                       | 0.089 |            | 0.044/0.219 | <b>0.0035</b> | 0.0142                       | 0.01  | 0.687      | 0.019/0.066 | <b>0.007</b> | 0.0059                       | 0.111 | 0.808      | 0.449/0.469 |
| VIF mediated degradation of apoBc3g      | 0.1274        | 0.099                        | 0.101 |            | 0.176/0.324 | <b>0.0049</b> | 0.0037                       | 0.028 | 0.708      | 0.009/0.107 | 0.059        | 0.0356                       | 0.158 |            | 0.638/0.906 |
| WNT signaling pathway                    | 0.0759        | 0.0703                       | 0.049 |            | 0.145/0.125 | 0.0016        | 0.007                        | 0.005 | 0.677      | 0.047/0.14  | 0.0129       |                              |       |            | 0.438/0.749 |

Significant pathways ( $p$ -value<0.01) are highlighted with red bold characters.

<sup>1</sup> $p$ -value was computed with permutation-based PCA using one optimal principal component.

<sup>2</sup> $p$ -value was computed with permutation-based PCA using multiple principal components as weight.

<sup>3</sup>False discovery rate (FDR) was measured by implementing random sampling for permutation-based PCA.

<sup>4</sup>Receiver operating characteristic (ROC)-area under curve (AUC) was evaluated for early recurrence within two years of surgery.
