# Supplementary material for: Recurrence-associated pathways in hepatitis B virus-positive hepatocellular carcinoma
Source: PubMed Central journal article supplement (PMC4448317; doi:10.1186/s12864-015-1472-x), 2015-04-10
Supplement: 12864_2015_1472_MOESM4_ESM.pdf [file 12864_2015_1472_MOESM4_ESM.pdf]

Figure S1

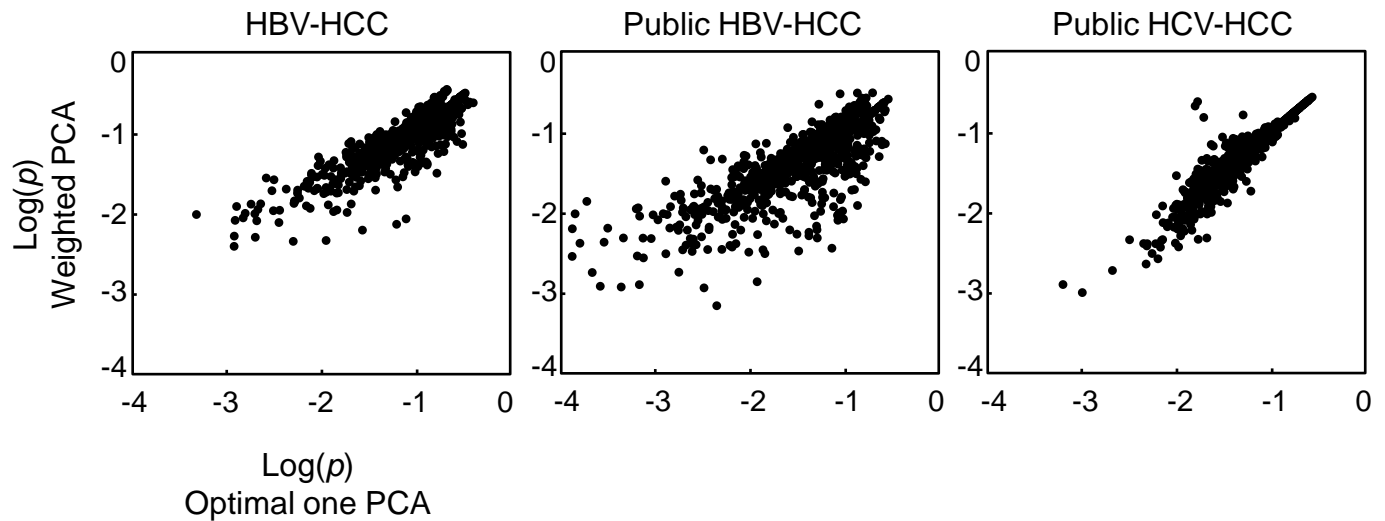

**Figure S1. Comparison of one-optimal PCA and weighted PCA methods.** Log-rank  $p$ -values of 882 pathways calculated with the two methods were compared. One-optimal PCA used one principal component optimally associated with recurrence while weighted PCA used multiple principal components explaining over 80% variance in each dataset.
