# Supplementary material for: Recurrence-associated pathways in hepatitis B virus-positive hepatocellular carcinoma
Source: PubMed Central journal article supplement (PMC4448317; doi:10.1186/s12864-015-1472-x), 2015-04-10
Supplement: 12864_2015_1472_MOESM5_ESM.pdf [file 12864_2015_1472_MOESM5_ESM.pdf]

Figure S2

### Axon guidance pathway

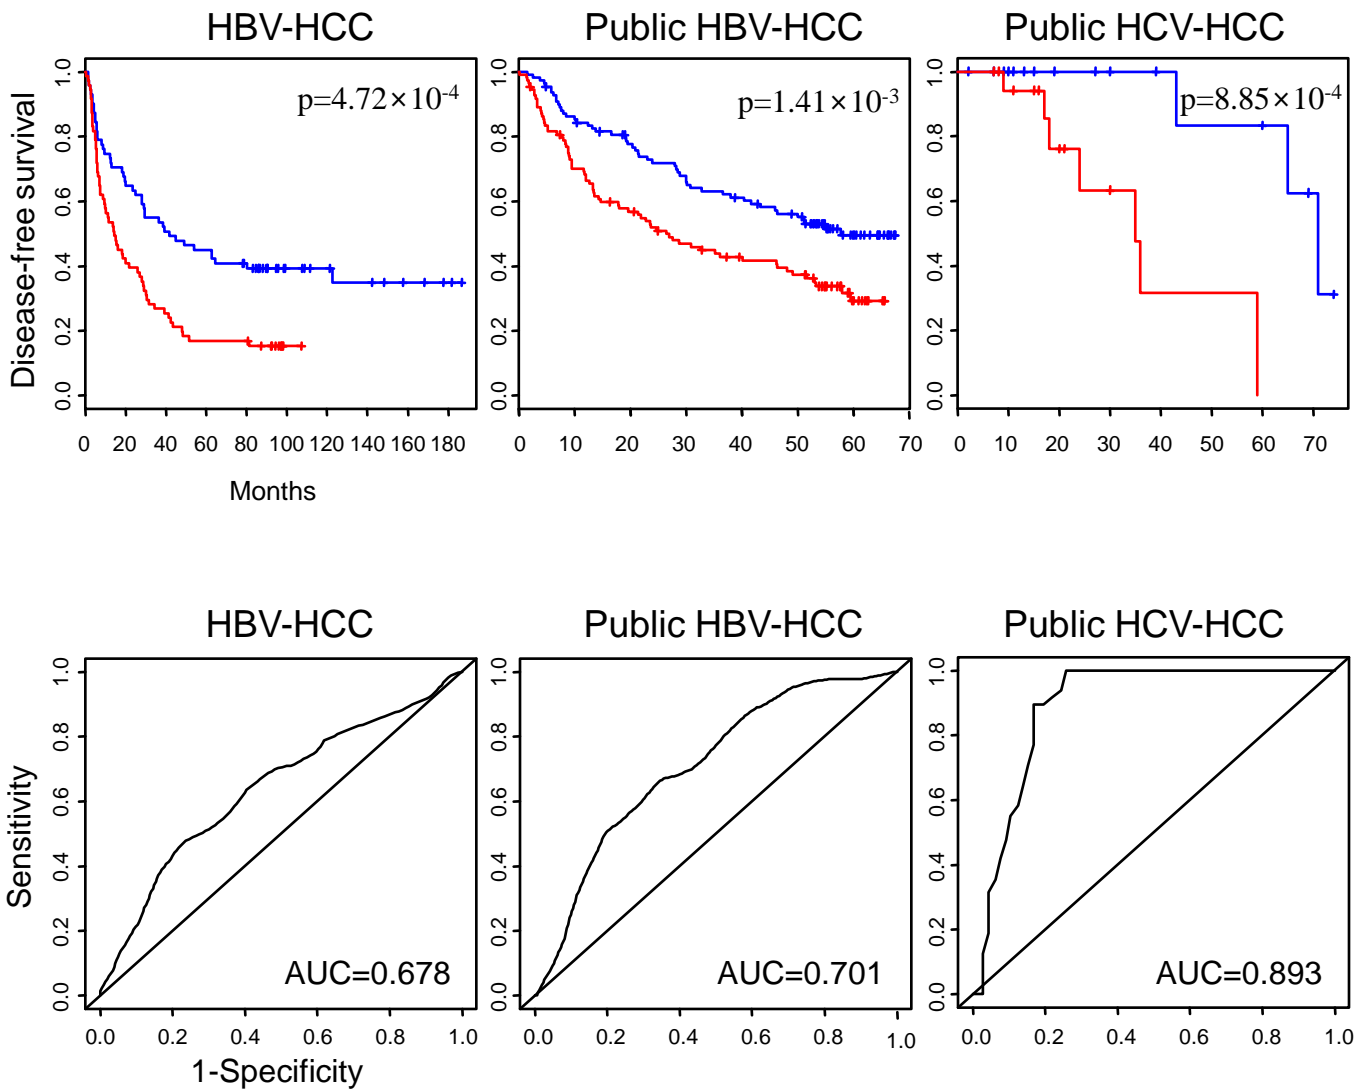

**Figure S2. Association of the axon guidance pathway with recurrence of HCC.** Kaplan-Meier plots and receiver operating characteristic (ROC) curve with the axon guidance pathway in HBV-HCC, public HBV-HCC and public HCV-HCC. For the Kaplan-Meier plot, samples were classified into two subgroups based on the median value of principal components of the axon guidance pathway.
