# Supplementary material for: Recurrence-associated pathways in hepatitis B virus-positive hepatocellular carcinoma
Source: PubMed Central journal article supplement (PMC4448317; doi:10.1186/s12864-015-1472-x), 2015-04-10
Supplement: 12864_2015_1472_MOESM8_ESM.pdf [file 12864_2015_1472_MOESM8_ESM.pdf]

Figure S5

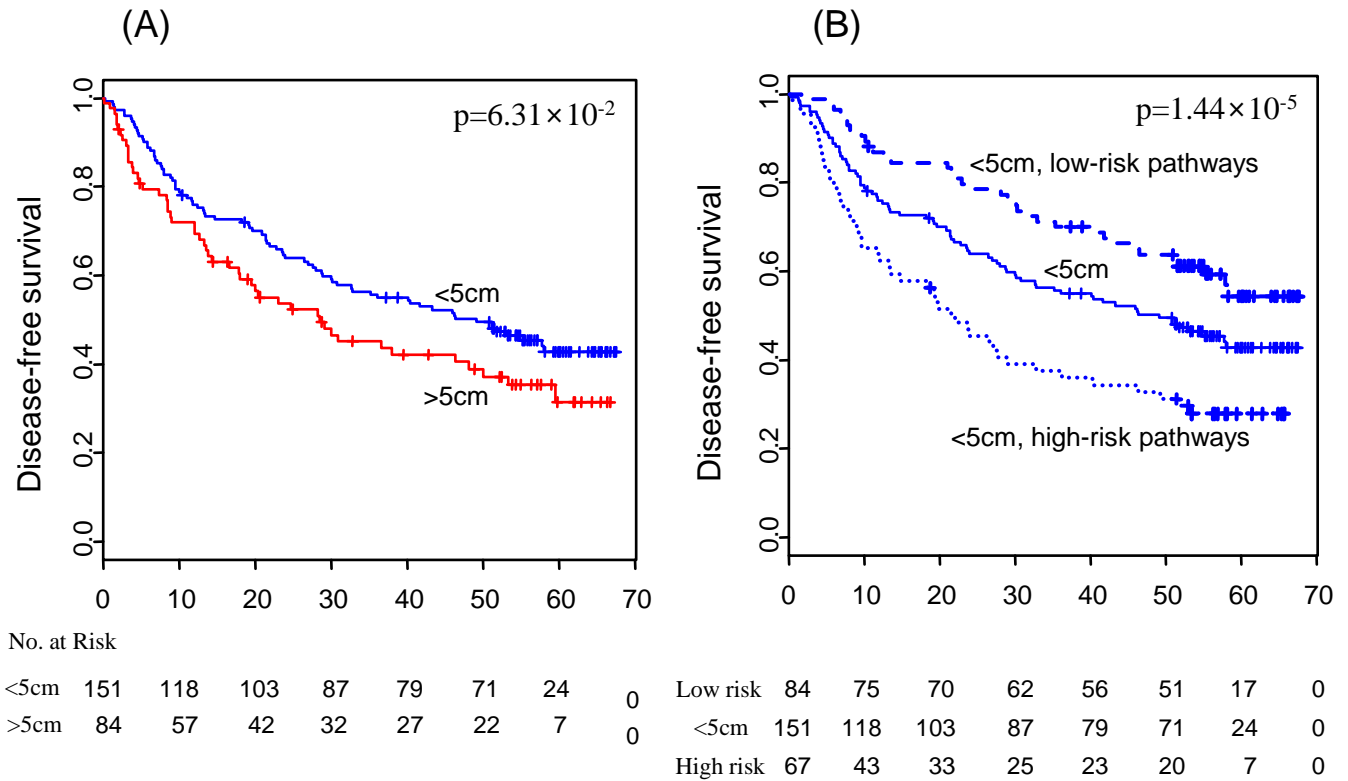

**Figure S5. Stratification of small tumor-size patients by recurrence-associated pathways.** (A) Kaplan-Meier plot for recurrence rates in two subgroups of patients based on tumor size (< and > 5 cm) in public HBV-HCC dataset. (B) Application of subgroup information determined from recurrence-associated pathways to small tumor-size patients (<5 cm) led to further stratification into two subgroups with different recurrence rates.
