# Supplementary material for: Recurrence-associated pathways in hepatitis B virus-positive hepatocellular carcinoma
Source: PubMed Central journal article supplement (PMC4448317; doi:10.1186/s12864-015-1472-x), 2015-04-10
Supplement: 12864_2015_1472_MOESM9_ESM.pdf [file 12864_2015_1472_MOESM9_ESM.pdf]

Figure S6

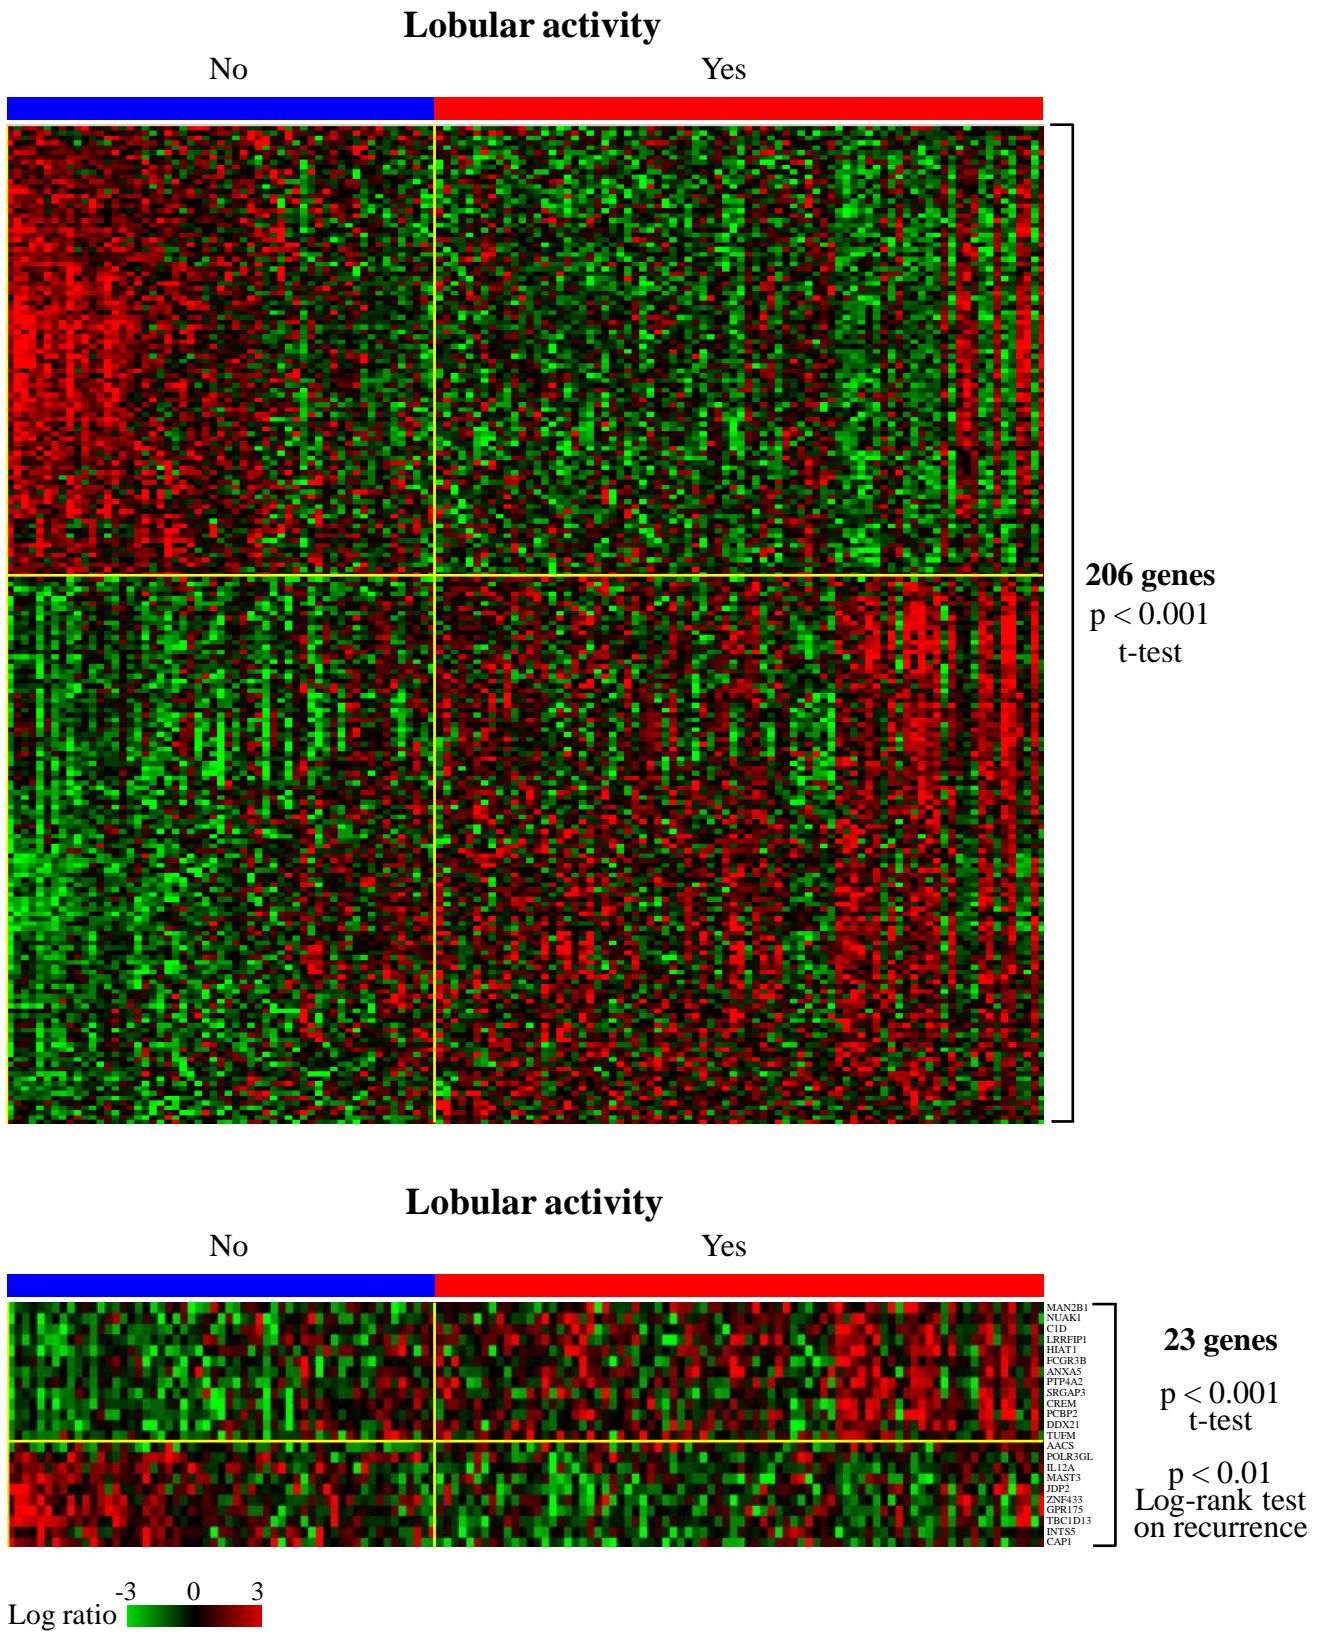

**Figure S6. Genes associated with lobular activity.** A total of 206 genes were selected as differentially expressed ( $p < 0.001$  with t-test) according to status of lobular activity. Among these genes, 23 were significantly associated with recurrence using the log-rank test ( $p < 0.01$ ).
