# Supplementary material for: Recurrence-associated pathways in hepatitis B virus-positive hepatocellular carcinoma
Source: PubMed Central journal article supplement (PMC4448317; doi:10.1186/s12864-015-1472-x), 2015-04-10
Supplement: 12864_2015_1472_MOESM11_ESM.pdf [file 12864_2015_1472_MOESM11_ESM.pdf]

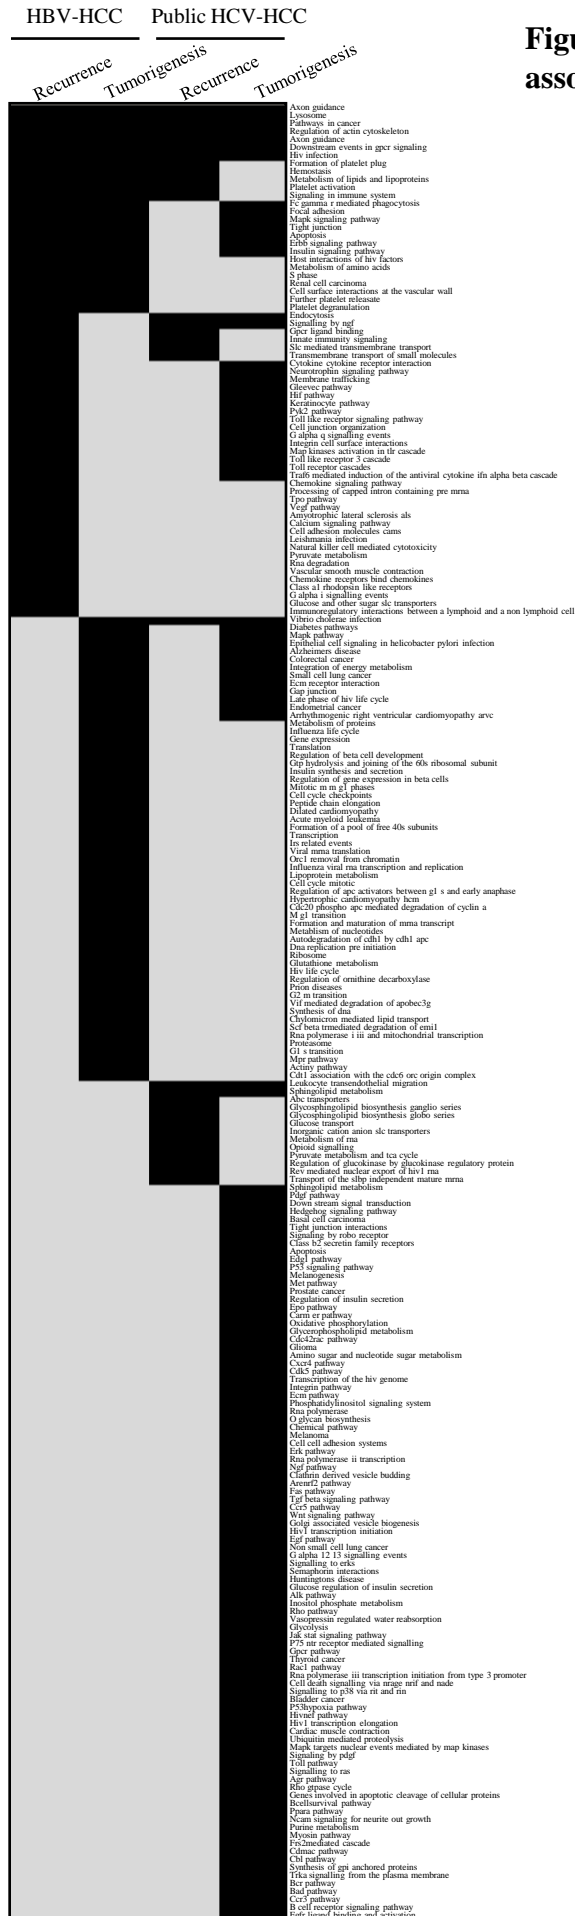

**Figure S8. Distribution of recurrence-associated and tumorigenic pathways.**
