# Supplementary material for: Recurrence-associated pathways in hepatitis B virus-positive hepatocellular carcinoma
Source: PubMed Central journal article supplement (PMC4448317; doi:10.1186/s12864-015-1472-x), 2015-04-10
Supplement: 12864_2015_1472_MOESM12_ESM.pdf [file 12864_2015_1472_MOESM12_ESM.pdf]

Figure S9

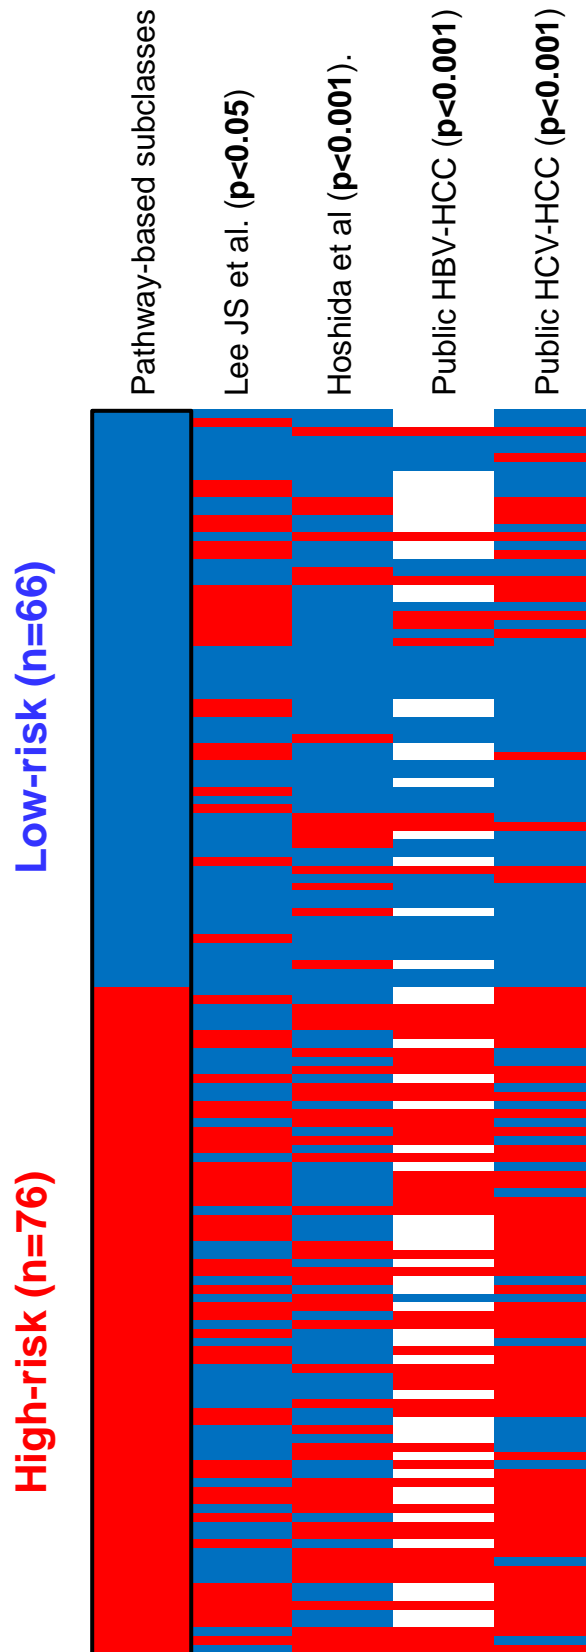

**Figure S9. Comparison of patient classification.** With previously reported prognosis-associated genes (Lee *et al.* [2], Hoshida *et al.* [8], public HBV-HCC [3] and public HCV-HCC [4] datasets), patient subclasses were determined using hierarchical clustering, and compared with subgroups obtained from our pathway-based method. Blue and red colors represent low- and high-risk subgroups, respectively, while white (public HBV-HCC) signifies the intermediate subgroup. Statistical significance was measured using Fisher's exact test in comparison with pathway-based low- and high-risk subclasses.
